# Supplementary material for: Impact of the HIV-1 env Genetic Context outside HR1–HR2 on Resistance to the Fusion Inhibitor Enfuvirtide and Viral Infectivity in Clinical Isolates
Source: PubMed Central journal article supplement (PMC3132734; doi:10.1371/journal.pone.0021535), 2011-07-08

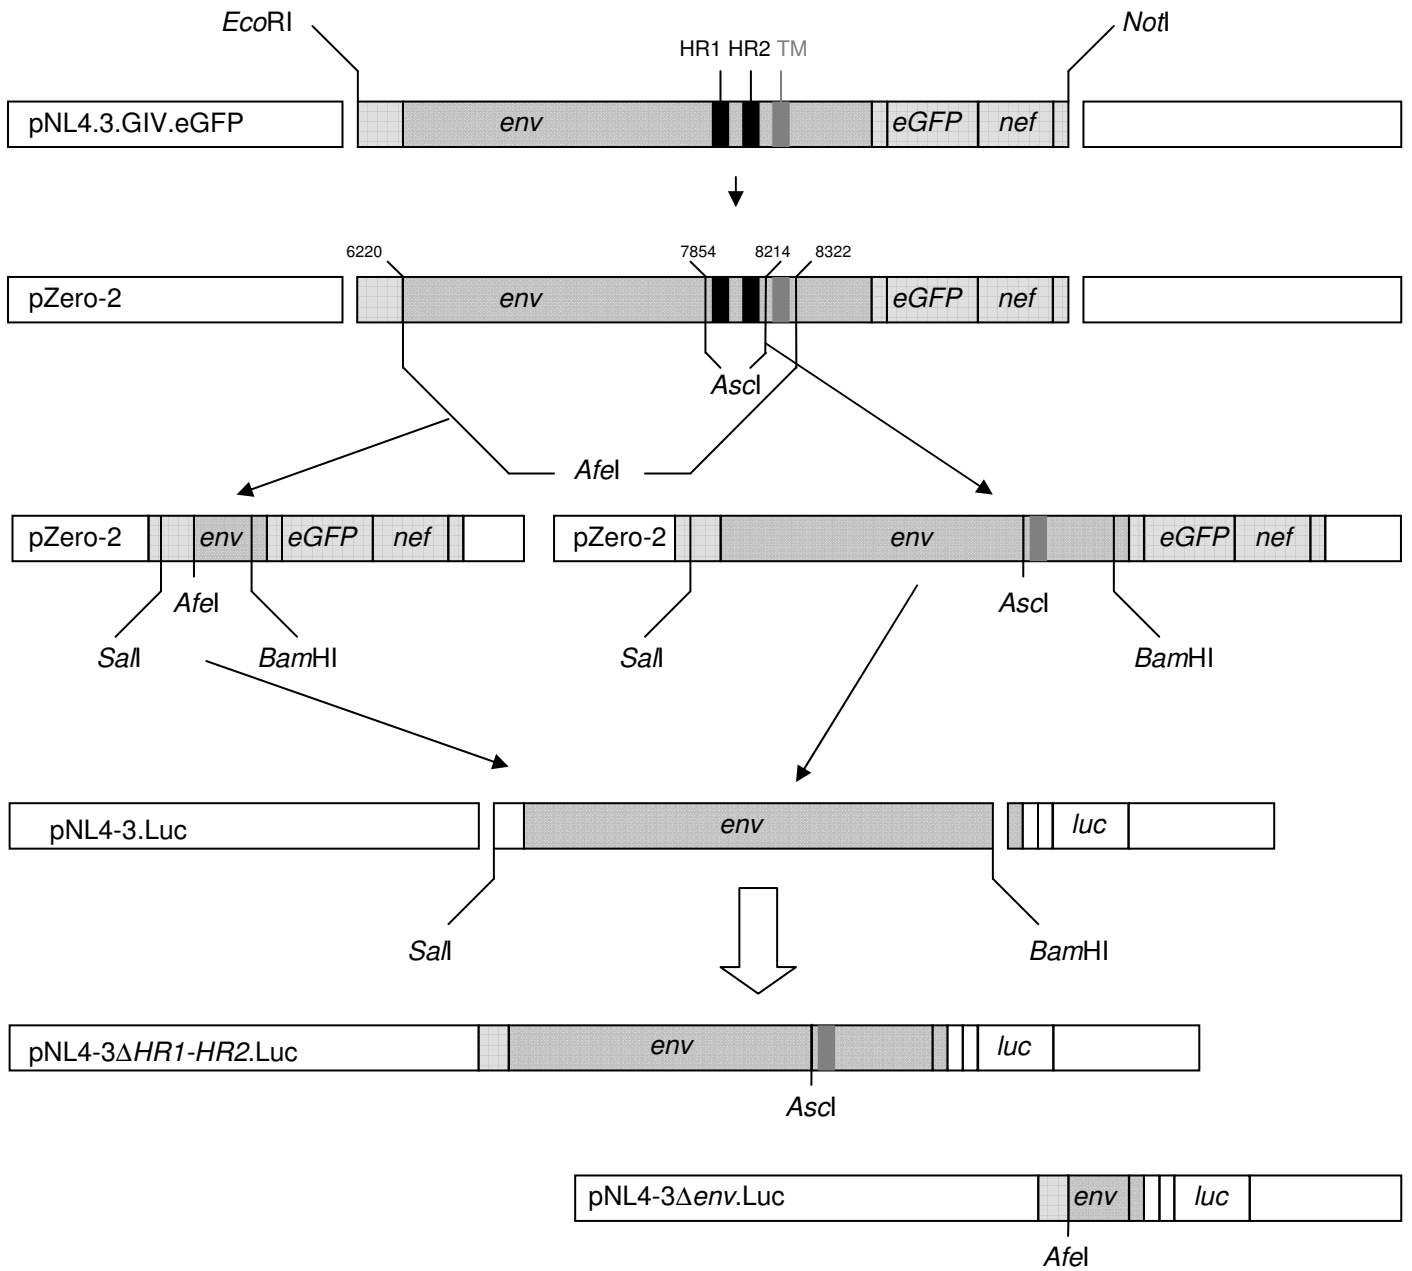

Supplement: pone.0021535.s001.pdf [file pone.0021535.s001.pdf]
