# Supplementary material for: Impact of the HIV-1 env Genetic Context outside HR1–HR2 on Resistance to the Fusion Inhibitor Enfuvirtide and Viral Infectivity in Clinical Isolates
Source: PubMed Central journal article supplement (PMC3132734; doi:10.1371/journal.pone.0021535), 2011-07-08
Supplement: pone.0021535.s002.pdf [file pone.0021535.s002.pdf]

|          |    |      |      |      |      |      |      |                                    |                                     |
|----------|----|------|------|------|------|------|------|------------------------------------|-------------------------------------|
| D_27.4   | I  | 4632 | 0.12 | 2759 | ND   | 0.13 | ND   | -M-----D-----Q-----R--T-----       | MN--DNM--Q--K-----YT-----S-----     |
| D_27.7   | I  | 5419 | 0.56 | 2350 | ND   | 0.17 | ND   | -M-----D-----Q-----R--T-----       | MN--DNM--Q--K--SK---YT-----S-----   |
| D_27.9   | I  | 1570 | 0.18 | 466  | ND   | 0.11 | ND   | -M-----DS-----Q-----R--T-----      | MN--DNM--Q--K-----YT-----S-----     |
| D_27.10  | NI | ND   | ND   | ND   | ND   | ND   | ND   | -M-----DS-----Q-----R--T-----      | MN--DNM--Q--K--K---YT-----S-----    |
| D_59.1   | NI | ND   | ND   | ND   | ND   | ND   | ND   | -M-----D-----Q-----R--T-----       | MN--DNMA--Q--K--SK---YT--A-S-----   |
| D_59.3   | I  | 7750 | 0.38 | 2310 | ND   | 0.25 | ND   | -M-----D-----Q-----R--T-----       | MN--DNM--Q--K--SK---YT--A-S-----    |
| D_59.4   | I  | 2414 | 0.37 | 6572 | ND   | 0.18 | ND   | -M-----D-----Q-----R--T-----       | MN--DNM--Q--K--SK---YT--A-S-----    |
| D_59.5   | I  | 2566 | 0.44 | 4446 | ND   | 0.28 | ND   | -M-----D-----Q-----R--T-----       | MN--DNM--Q--K--SK---YT---SR-----    |
| D_59.6   | I  | 5682 | 0.47 | 2161 | ND   | 0.03 | ND   | -M-----D-----Q-----R--T-----       | MN--DNM--Q--E--SK---YT--A-S-----    |
| D_94.3   | I  | 7022 | 0.81 | 2587 | ND   | 0.42 | ND   | -M-----D-----Q-----R--T-----       | MN--DNM--Q--K--SK-S--YT--A-S-----   |
| D_94.4   | NI | ND   | ND   | ND   | ND   | ND   | ND   | -M-----D-----P-----Q-----R--T----- | MN--DNM--Q--K--SK---YT--A-S--D----- |
| D_94.5   | NI | ND   | ND   | ND   | ND   | ND   | ND   | -M-----D-----Q-----R--T-----       | MN--DNM--Q--K--SK---YT--A-S--D----- |
| D_94.6   | NI | ND   | ND   | ND   | ND   | ND   | ND   | -M-----D-----Q-----R--T-----       | MN--DNM--Q--K--SK-S--YT--A-S-----   |
| D_94.7   | NI | ND   | ND   | ND   | ND   | ND   | ND   | -M-----D-----Q-----R--T-----       | MN--DNM--Q--K--SK-S--YT--A-S-----   |
| E_-129.1 | I  | 0.63 | 1.79 | ND   | 8.52 | ND   | 0.03 | -----I-----V-----T-----            | DE--KNM--Q-----DI-YN-----           |
| E_-129.2 | NI | ND   | ND   | ND   | ND   | ND   | ND   | -----I-----V-----T-----            | DE--KNM--Q-----DI-YN-----           |
| E_-129.3 | NI | ND   | ND   | ND   | ND   | ND   | ND   | -----I-----V-----T-----            | DE--KNM--Q--G-----DI-YN-----        |
| E_-129.4 | I  | 1.02 | 0.93 | ND   | 5.09 | ND   | 0.03 | -----I-----V-----T-----            | DE--KNM--Q-----DI-YN-----           |
| E_-129.5 | I  | 0.47 | 1.20 | ND   | 3.97 | ND   | 0.05 | -----I-----V-----T-----            | DE--KNM--Q-----DI-YN-----           |
| E_42.1   | I  | 683  | 1.66 | ND   | 1338 | ND   | 0.06 | -----D-----I-----V-----T-----      | QNE--NM--Q-----GI-YN--KA-----       |
| E_42.2   | NI | ND   | ND   | ND   | ND   | ND   | ND   | -----D-----I-----V-----T-----      | QDE--GNM--Q-----GI-YN--KA-----      |
| E_42.4   | NI | ND   | ND   | ND   | ND   | ND   | ND   | -----D-----I-----V-----T-----      | QNE--NM--Q-----GI-YN--KA-----       |
| E_42.6   | I  | 1048 | 1.86 | 5836 | 2924 | 0.60 | 0.15 | -----D-----I-----V-----T-----      | NE--ENM--Q--K-----DI-YN--KA-----    |
| E_42.7   | I  | 1045 | 0.49 | 4518 | ND   | 0.31 | ND   | -----D-----I-----V-----T-----      | QDE--NM--Q-----GI-YN--KA-----       |

<sup>a</sup> Clone identifiers are composed of a letter designating the patient (A-E) followed by a number corresponding to the week of sampling relative to enfuvirtide treatment beginning at week 0 (first number preceding the dot) followed by the clone number

<sup>b</sup> infectious

<sup>c</sup> non infectious

<sup>d</sup> Fold Change in 50% Inhibitory Concentration

<sup>e</sup> Relative Infectivity

<sup>f</sup> HR1 and HR2 domains are underlined and the region between AA 36 to 45, as well as position 138 in HR2 are highlighted in bold letters.

<sup>g</sup> not determined
