# Supplementary material for: Impact of the HIV-1 env Genetic Context outside HR1–HR2 on Resistance to the Fusion Inhibitor Enfuvirtide and Viral Infectivity in Clinical Isolates
Source: PubMed Central journal article supplement (PMC3132734; doi:10.1371/journal.pone.0021535), 2011-07-08
Supplement: pone.0021535.s003.pdf [file pone.0021535.s003.pdf]

**Table S2: Patient clinical data**

| week | VL   | CD4 count | Actual Treatment | previous treatment history                          | ENF resistance mutations                                                                             | resistance mutations | predicted active drugs <sup>a</sup>             |
|------|------|-----------|------------------|-----------------------------------------------------|------------------------------------------------------------------------------------------------------|----------------------|-------------------------------------------------|
| A    | -37  |           |                  |                                                     | AZT, AZT + 3TC, 3TC + d4T + SQV, d4T + DDI + IDV, AZT + 3TC + NFV + NVP                              |                      |                                                 |
|      | -5   | 49900     | 44               | DDI + APV + LPV/r                                   |                                                                                                      |                      | ENF=1 LPV=0<br>DDI=0.5 TDF=0.5                  |
|      | 20   | 21700     | 82               | DDI + ENF + LPV/r + TDF                             |                                                                                                      | G36D/E/V             |                                                 |
|      | 54   | 9900      | 37               |                                                     |                                                                                                      | G36D                 |                                                 |
|      | 95   | 64000     | 53               |                                                     |                                                                                                      | G36D, S138P          |                                                 |
| B    | -5   | 372000    | 30               | LPV/r + EFV + TDF                                   | AZT + DDC, AZT + 3TC + SQV, d4T + 3TC + IDV, EFV + d4T + RTV, NFV, NVP, d4T + TZV, APV/r + d4T + 3TC |                      |                                                 |
|      | 16   | >200000   | 40               | LPV/r + ENF + TDF, ENF interrupted wk 22 to week 29 |                                                                                                      | N43D                 | ENF=1 LPV=0 TDF=0                               |
|      | 25   |           |                  |                                                     |                                                                                                      | N43D, S138A          |                                                 |
|      | 45   | 176000    | 20               |                                                     |                                                                                                      | N43D, S138A          |                                                 |
| C    | -9   | >100.000  | 90               |                                                     | AZT, AZT + DDI, AZT + DDC, DDI + D4T + RTV, D4T + 3TC + IDV, NFV + SQV + D4T, NFV + NVP + D4T        |                      |                                                 |
|      | -1   |           |                  | ABV + LPV/r + DDI                                   |                                                                                                      |                      | 3TC=1 TDF=0.5<br>AZT=1 ENF=1                    |
|      | 27   | 1000      |                  | AZT + 3TC + TDF + ENF                               |                                                                                                      | G36D, V38A           |                                                 |
|      | 59   | 30000     | 130              |                                                     |                                                                                                      | V38A                 |                                                 |
|      | 94   |           |                  |                                                     |                                                                                                      | V38A                 |                                                 |
|      | 129  | 80000     | 80               |                                                     |                                                                                                      | V38A                 |                                                 |
| D    | -113 |           |                  |                                                     | AZT, AZT + DDC, DDI + D4T + IDV                                                                      |                      |                                                 |
|      | -5   | 100000    | 160              | NFV + 3TC + NVP                                     |                                                                                                      |                      |                                                 |
|      | 27   | 8000      | 100              | TDF + AZT + 3TC + ENF                               |                                                                                                      | N42S+N43D+126K, N42D |                                                 |
|      | 59   | 10000     | 10               |                                                     |                                                                                                      | N43D+N126K+S138A     |                                                 |
|      | 94   | 20000     | 80               |                                                     |                                                                                                      | N43D+S138A           |                                                 |
| E    | -133 | 43300     | 410              |                                                     | AZT + DDC, AZT + DDI, AZT + 3TC + SQV, 3TC + D4T + IDV, DDI + ABV + NVP + SQV/r.                     |                      |                                                 |
|      | -129 | 4960      |                  | TDF + ABV + LPV/r + NVP                             |                                                                                                      |                      | DDI= 0 AZT=0 3TC=1<br>TDF=0.5 TPVR/r=0<br>ENF=1 |
|      | 42   | 80408     | 80               | DDI + AZT + 3TC + TDF + TPV/r + ENF                 |                                                                                                      | N43D, S138A          |                                                 |

<sup>a</sup> The predicted activity for each drug within the enfuvirtide-based regimen was calculated using the Stanford HIVdb-algorithm ([www.hivdb.stanford.edu](http://www.hivdb.stanford.edu)). The level of inferred resistance was scored as follows: 0 for high-level resistance, 0.5 for intermediate resistance or low-level resistance, 1 for potential low-level resistance or susceptible.
